# Supplementary material for: Assessing the Reliability of SARS-CoV-2 Neutralization Studies That Use Post-Vaccination Sera
Source: Vaccines (Basel). 2022 May 26;10(6):850. doi: 10.3390/vaccines10060850 (PMC9227377; doi:10.3390/vaccines10060850)
Supplement: Supplementary file 1 [file vaccines-10-00850-s001.zip › Supplementary Data 2.xlsx]

## Sheet: Template
	Study author:		Garcia-Beltram et al.			Link:	Cell								Study author:		Planas et al.			Link:	Nature								Study author:		Hoffmann et al.			Link:	Cell								Study author:		Kuzmina et al			Link:	Cell Host & Microbe
	Aspect category	Aspect		Decription					Status				Impact on reliability		Aspect category	Aspect		Decription					Status				Impact on reliability		Aspect category	Aspect		Decription					Status				Impact on reliability		Aspect category	Aspect		Decription
	Cohort details	Sample size		Sample size					21-50						Cohort details	Sample size		Sample size					5-20						Cohort details	Sample size		Sample size					5-20						Cohort details	Sample size		Sample size
				How many samples were included?														How many samples were included?														How many samples were included?														How many samples were included?
		SARS-CoV-2 infection		Reported					Yes, and subjects stratified							SARS-CoV-2 infection		Reported					Yes, only naive included							SARS-CoV-2 infection		Reported					Yes, only naive included							SARS-CoV-2 infection		Reported
				Was pre-vaccination COVID-19 considered?														Was pre-vaccination COVID-19 considered?														Was pre-vaccination COVID-19 considered?														Was pre-vaccination COVID-19 considered?
				Confirmed					No / not reported									Confirmed					Yes									Confirmed					Yes									Confirmed
				Previous infection confirmed by NP-ELISA or similar means?														Previous infection confirmed by NP-ELISA or similar means?														Previous infection confirmed by NP-ELISA or similar means?														Previous infection confirmed by NP-ELISA or similar means?
				Breakthrough cases reported					N. a.									Breakthrough cases reported					N. a.									Breakthrough cases reported					N. a.									Breakthrough cases reported
				Are breakthrough cases reported? Applicable if this is relevant in the context of the study.														Are breakthrough cases reported? Applicable if this is relevant in the context of the study.														Are breakthrough cases reported? Applicable if this is relevant in the context of the study.														Are breakthrough cases reported? Applicable if this is relevant in the context of the study.
				Breakthrough cases stratified					N. a.									Breakthrough cases stratified					N. a.									Breakthrough cases stratified					N. a.									Breakthrough cases stratified
				If breakthrough cases occured, did the authors stratify?														If breakthrough cases occured, did the authors stratify?														If breakthrough cases occured, did the authors stratify?														If breakthrough cases occured, did the authors stratify?
		Vaccination regimen		Dosing interval reported					Yes							Vaccination regimen		Dosing interval reported					Yes							Vaccination regimen		Dosing interval reported					Yes							Vaccination regimen		Dosing interval reported
				Do the authors report the dosing interval (if applicable)?														Do the authors report the dosing interval (if applicable)?														Do the authors report the dosing interval (if applicable)?														Do the authors report the dosing interval (if applicable)?
				Stratified by partial / full immunization					Yes									Stratified by partial / full immunization					Yes									Stratified by partial / full immunization					Yes									Stratified by partial / full immunization
				Do the authors stratiy by partial and full immunization?														Do the authors stratiy by partial and full immunization?														Do the authors stratiy by partial and full immunization?														Do the authors stratiy by partial and full immunization?
		Sample collection period		>7 days post last dose					Yes							Sample collection period		>7 days post last dose					Yes							Sample collection period		>7 days post last dose					Yes							Sample collection period		>7 days post last dose
				Were all samples taken at least seven days post final dose? Adjust to "YES" if <10% of samples are taken earlier.														Were all samples taken at least seven days post final dose? Adjust to "YES" if <10% of samples are taken earlier.														Were all samples taken at least seven days post final dose? Adjust to "YES" if <10% of samples are taken earlier.														Were all samples taken at least seven days post final dose? Adjust to "YES" if <10% of samples are taken earlier.
				Stratified OR 14 d - 4 mo post full immunization					No									Stratified OR 14 d - 4 mo post full immunization					Yes									Stratified OR 14 d - 4 mo post full immunization					Yes									Stratified OR 14 d - 4 mo post full immunization
				Are the results stratified OR are all samples taken between 2 weeks and 4 months post final dose? Adjust to "YES" if <20% of sample do not comply.														Are the results stratified OR are all samples taken between 2 weeks and 4 months post final dose? Adjust to "YES" if <20% of sample do not comply.														Are the results stratified OR are all samples taken between 2 weeks and 4 months post final dose? Adjust to "YES" if <20% of sample do not comply.														Are the results stratified OR are all samples taken between 2 weeks and 4 months post final dose? Adjust to "YES" if <20% of sample do not comply.
		Demographic characterization		Age distribution reported					Yes							Demographic characterization		Age distribution reported					Yes							Demographic characterization		Age distribution reported					Yes							Demographic characterization		Age distribution reported
				Is the age distribution (range) of all subjects reported?														Is the age distribution (range) of all subjects reported?														Is the age distribution (range) of all subjects reported?														Is the age distribution (range) of all subjects reported?
				Stratified by age group (<18 or 18 - 59 or ≥60)					Yes									Stratified by age group (<18 or 18 - 59 or ≥60)					Yes									Stratified by age group (<18 or 18 - 59 or ≥60)					Yes									Stratified by age group (<18 or 18 - 59 or ≥60)
				Adjust to "YES" if <20% of samples belong to different age groups														Adjust to "YES" if <20% of samples belong to different age groups														Adjust to "YES" if <20% of samples belong to different age groups														Adjust to "YES" if <20% of samples belong to different age groups
				Sex distribution reported					Yes									Sex distribution reported					Yes									Sex distribution reported					Yes									Sex distribution reported
				Is the sex distribution of all subjects reported?														Is the sex distribution of all subjects reported?														Is the sex distribution of all subjects reported?														Is the sex distribution of all subjects reported?
				Stratified by sex or equal sex distribution					Equal sex distribution									Stratified by sex or equal sex distribution					Not stratified nor equally distributed									Stratified by sex or equal sex distribution					Not stratified nor equally distributed									Stratified by sex or equal sex distribution
				Equal sex distribution: 50% ± 10% per sex. Adjust to "YES" if <20% of samples were not stratified.														Equal sex distribution: 50% ± 10% per sex. Adjust to "YES" if <20% of samples were not stratified.														Equal sex distribution: 50% ± 10% per sex. Adjust to "YES" if <20% of samples were not stratified.														Equal sex distribution: 50% ± 10% per sex. Adjust to "YES" if <20% of samples were not stratified.
				Cohort selection unbiased					Yes									Cohort selection unbiased					Yes									Cohort selection unbiased					Yes									Cohort selection unbiased
				If only a subgroup of the initial study cohort was analyzed, did the cohort selection happen unbiased (no pre-selection of high-titre reponders etc)?														If only a subgroup of the initial study cohort was analyzed, did the cohort selection happen unbiased (no pre-selection of high-titre reponders etc)?														If only a subgroup of the initial study cohort was analyzed, did the cohort selection happen unbiased (no pre-selection of high-titre reponders etc)?														If only a subgroup of the initial study cohort was analyzed, did the cohort selection happen unbiased (no pre-selection of high-titre reponders etc)?
				Study period and geographic location reported					N. a.									Study period and geographic location reported					N. a.									Study period and geographic location reported					N. a.									Study period and geographic location reported
				Applicable if SARS-CoV-2 infections occured and variant identification & distribution is not reported for the cohort.														Applicable if SARS-CoV-2 infections occured and variant identification & distribution is not reported for the cohort.														Applicable if SARS-CoV-2 infections occured and variant identification & distribution is not reported for the cohort.														Applicable if SARS-CoV-2 infections occured and variant identification & distribution is not reported for the cohort.
				Variant prevalence reported					N. a.									Variant prevalence reported					N. a.									Variant prevalence reported					N. a.									Variant prevalence reported
				Applicable if any SARS-CoV-2 infections occured.														Applicable if any SARS-CoV-2 infections occured.														Applicable if any SARS-CoV-2 infections occured.														Applicable if any SARS-CoV-2 infections occured.
				Stratified by variant prevalence					N. a.									Stratified by variant prevalence					N. a.									Stratified by variant prevalence					N. a.									Stratified by variant prevalence
				Applicable if SARS-CoV-2 infections with multiple variants occured.														Applicable if SARS-CoV-2 infections with multiple variants occured.														Applicable if SARS-CoV-2 infections with multiple variants occured.														Applicable if SARS-CoV-2 infections with multiple variants occured.
		Clinical characterization		Reported					N. a.							Clinical characterization		Reported					N. a.							Clinical characterization		Reported					N. a.							Clinical characterization		Reported
				Is any relevant clinical characterization reported? Applicable if at least one third of the study cohort is likely or known to have clinical conditions that might affect immunity.														Is any relevant clinical characterization reported? Applicable if at least one third of the study cohort is likely or known to have clinical conditions that might affect immunity.														Is any relevant clinical characterization reported? Applicable if at least one third of the study cohort is likely or known to have clinical conditions that might affect immunity.														Is any relevant clinical characterization reported? Applicable if at least one third of the study cohort is likely or known to have clinical conditions that might affect immunity.
				Stratifed by immunocompromised					N. a.									Stratifed by immunocompromised					N. a.									Stratifed by immunocompromised					N. a.									Stratifed by immunocompromised
				Applicable if clinical characterization applies. Adjust to "YES" if <20% of samples were not stratified.														Applicable if clinical characterization applies. Adjust to "YES" if <20% of samples were not stratified.														Applicable if clinical characterization applies. Adjust to "YES" if <20% of samples were not stratified.														Applicable if clinical characterization applies. Adjust to "YES" if <20% of samples were not stratified.
	Assay details	Protocol		Assay type reported					Yes						Assay details	Protocol		Assay type reported					Yes						Assay details	Protocol		Assay type reported					Yes						Assay details	Protocol		Assay type reported
				Is the precise assay type and endpoint reported (pseudovirus vs life virus, NT20, NT50, NT80 etc)?														Is the precise assay type and endpoint reported (pseudovirus vs life virus, NT20, NT50, NT80 etc)?														Is the precise assay type and endpoint reported (pseudovirus vs life virus, NT20, NT50, NT80 etc)?														Is the precise assay type and endpoint reported (pseudovirus vs life virus, NT20, NT50, NT80 etc)?
				Precise protocol reported					Yes									Precise protocol reported					Yes									Precise protocol reported					Yes									Precise protocol reported
				Do the authors provide a precise protocol for the neutralization assay within the manuscript?														Do the authors provide a precise protocol for the neutralization assay within the manuscript?														Do the authors provide a precise protocol for the neutralization assay within the manuscript?														Do the authors provide a precise protocol for the neutralization assay within the manuscript?
		Live virus strain (if applicable)		Virus lineage reported					N. a.							Live virus strain (if applicable)		Virus lineage reported					Yes							Live virus strain (if applicable)		Virus lineage reported					N. a.							Live virus strain (if applicable)		Virus lineage reported
				Applicable if live virus neutralization was performed.														Applicable if live virus neutralization was performed.														Applicable if live virus neutralization was performed.														Applicable if live virus neutralization was performed.
				Sequence confirmation by sequencing					N. a.									Sequence confirmation by sequencing					Yes									Sequence confirmation by sequencing					N. a.									Sequence confirmation by sequencing
				Applicable if live virus neutralization was performed.														Applicable if live virus neutralization was performed.														Applicable if live virus neutralization was performed.														Applicable if live virus neutralization was performed.
		Pseudo virus strain (if applicable)		Construct details reported					Yes							Pseudo virus strain (if applicable)		Construct details reported					N. a.							Pseudo virus strain (if applicable)		Construct details reported					Yes							Pseudo virus strain (if applicable)		Construct details reported
				Applicable if pseudovirus neutralization was performed.														Applicable if pseudovirus neutralization was performed.														Applicable if pseudovirus neutralization was performed.														Applicable if pseudovirus neutralization was performed.
				All variant-associated spike mutations					Yes									All variant-associated spike mutations					N. a.									All variant-associated spike mutations					Yes									All variant-associated spike mutations
				Applicable if pseudovirus neutralization was performed. Are all variant-associated spike mutations included to the pseudovirus?														Applicable if pseudovirus neutralization was performed. Are all variant-associated spike mutations included to the pseudovirus?														Applicable if pseudovirus neutralization was performed. Are all variant-associated spike mutations included to the pseudovirus?														Applicable if pseudovirus neutralization was performed. Are all variant-associated spike mutations included to the pseudovirus?
				Sequence confirmation by sequencing					No									Sequence confirmation by sequencing					N. a.									Sequence confirmation by sequencing					No									Sequence confirmation by sequencing
				Applicable if pseudovirus neutralization was performed.														Applicable if pseudovirus neutralization was performed.														Applicable if pseudovirus neutralization was performed.														Applicable if pseudovirus neutralization was performed.
		Assay standardization		virus titre reported and consistent					Not consistent or with high variance							Assay standardization		virus titre reported and consistent					Consistent and with small variance							Assay standardization		virus titre reported and consistent					Consistent and with small variance							Assay standardization		virus titre reported and consistent
				Are virus titres used for neutralization assays reported and if so: consistent and with small input variance?														Are virus titres used for neutralization assays reported and if so: consistent and with small input variance?														Are virus titres used for neutralization assays reported and if so: consistent and with small input variance?														Are virus titres used for neutralization assays reported and if so: consistent and with small input variance?
				Error in titre reported by back titration					Yes									Error in titre reported by back titration					No									Error in titre reported by back titration					Yes									Error in titre reported by back titration
				Was the virus titre used for neutralization assays confirmed by the authors by back-titration or similar means?														Was the virus titre used for neutralization assays confirmed by the authors by back-titration or similar means?														Was the virus titre used for neutralization assays confirmed by the authors by back-titration or similar means?														Was the virus titre used for neutralization assays confirmed by the authors by back-titration or similar means?
				WHO IS antibody used					No									WHO IS antibody used					No									WHO IS antibody used					No									WHO IS antibody used
				WHO international standard antibody used for standardization?														WHO international standard antibody used for standardization?														WHO international standard antibody used for standardization?														WHO international standard antibody used for standardization?
				Details on cell culture reported					Yes									Details on cell culture reported					Yes									Details on cell culture reported					Yes									Details on cell culture reported
				Are precise details on cell culture reported (cell culture conditions, maximum passage number etc)?														Are precise details on cell culture reported (cell culture conditions, maximum passage number etc)?														Are precise details on cell culture reported (cell culture conditions, maximum passage number etc)?														Are precise details on cell culture reported (cell culture conditions, maximum passage number etc)?
	Data	Data reporting		Raw data reported					No						Data	Data reporting		Raw data reported					Yes						Data	Data reporting		Raw data reported					No						Data	Data reporting		Raw data reported
				Raw data for neutralization titres reported?														Raw data for neutralization titres reported?														Raw data for neutralization titres reported?														Raw data for neutralization titres reported?
				Reference virus is appropriate (non VoI/VoC)					Yes									Reference virus is appropriate (non VoI/VoC)					Yes									Reference virus is appropriate (non VoI/VoC)					Yes									Reference virus is appropriate (non VoI/VoC)
				Is the reference virus used for calculating variant-specific fold-changes reasonable (non VoI/VoC)?														Is the reference virus used for calculating variant-specific fold-changes reasonable (non VoI/VoC)?														Is the reference virus used for calculating variant-specific fold-changes reasonable (non VoI/VoC)?														Is the reference virus used for calculating variant-specific fold-changes reasonable (non VoI/VoC)?
				Data shown as individual values with statistics					Yes									Data shown as individual values with statistics					Yes									Data shown as individual values with statistics					Yes									Data shown as individual values with statistics
				Are individual data points and apropriate statistics provided?														Are individual data points and apropriate statistics provided?														Are individual data points and apropriate statistics provided?														Are individual data points and apropriate statistics provided?
									Overall risk of low reliability:				HIGH										Overall risk of low reliability:				MEDIUM										Overall risk of low reliability:				MEDIUM
